# Supplementary material for: Reorganization of Thalamic Inputs to Lesioned Cortex Following Experimental Traumatic Brain Injury
Source: MDPI journal article supplement (doi:10.3390/ijms22126329), 2021-06-13
Supplement: s1 [file s1]

## Supplementary Materials

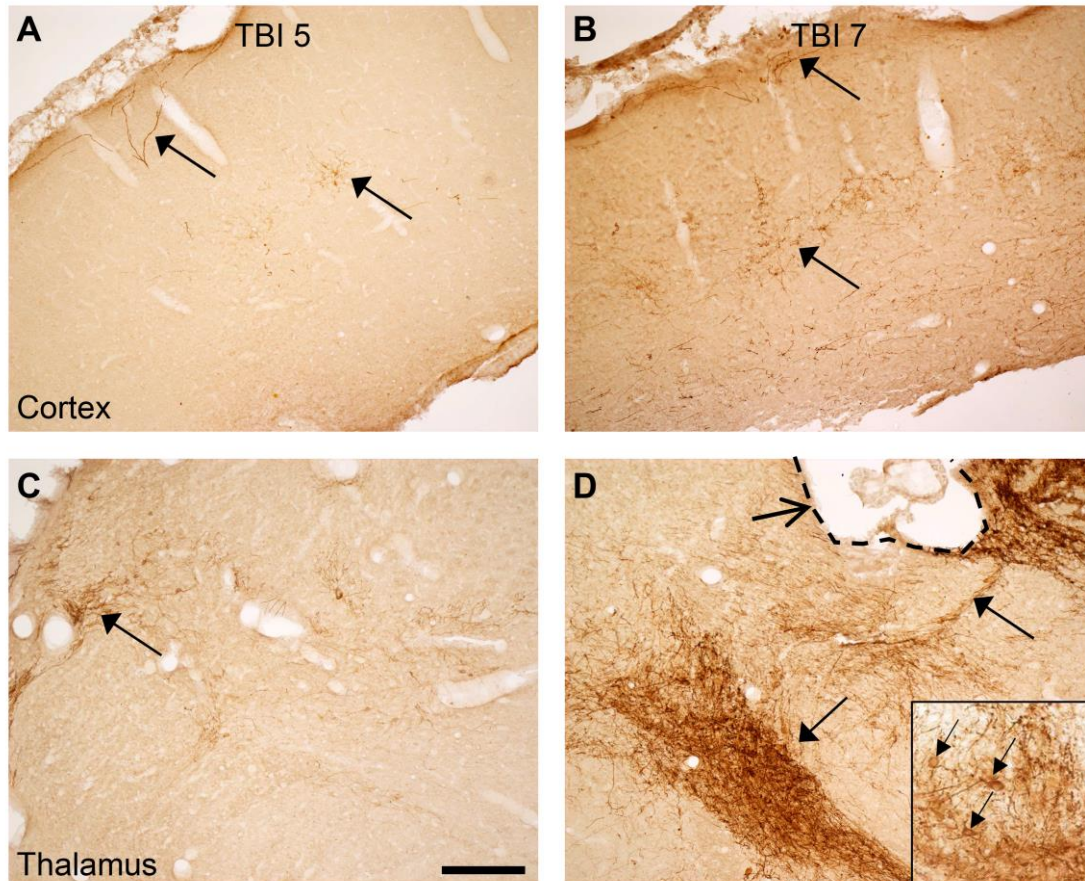

**Supplementary figure S1.** Photomicrograph demonstrating the expression of ChR2-eYFP in the cortex and thalamus of two traumatic brain injured (TBI) rats that showed no EEG response during optogenetic stimulation. **(A, C)** the cortex and thalamus (filled arrows) respectively of case number 5 (TBI5). This case (out of 4 TBI non-responding) had the lowest expression of ChR2-eYFP. **(B, D)** TBI case number 7 (TBI7) had the most expression (of the 4 TBI non-responding cases) of ChR2-eYFP in the cortex and the thalamus (filled arrows). Note the tip of the optical cannula in the thalamus (dotted black line, open arrowhead). Scale bar equals 200 $\mu$ m.

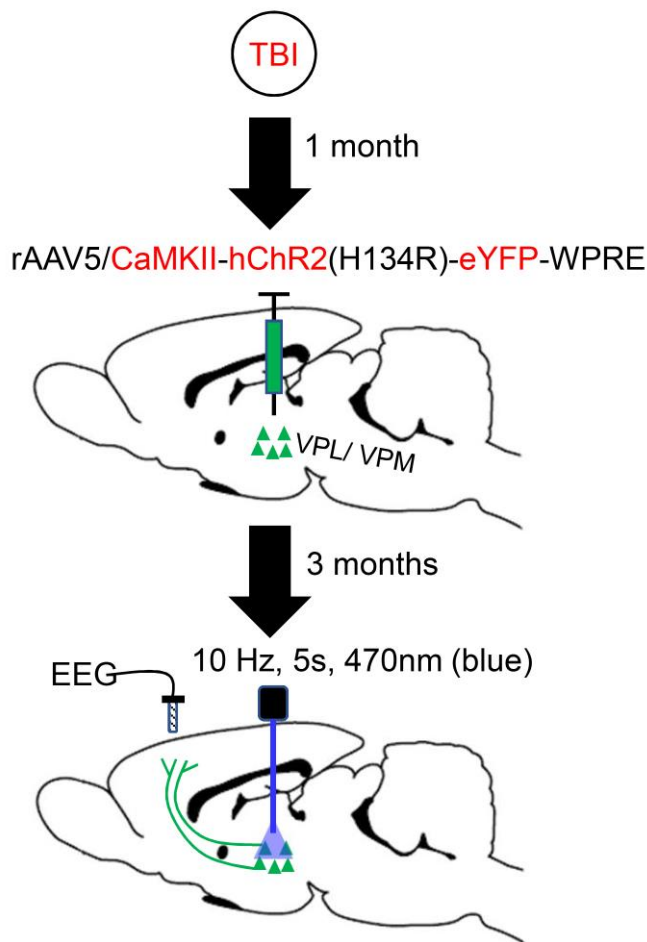

**Supplementary figure S2.** Study design. Rats were injured using the lateral fluid percussion brain injury model. Sham-operated controls went through same surgical procedure but did not receive the injury. At 1-month post-injury, rats were injected into the thalamus targeting the thalamic VPL/VPM nuclei with an AAV carrying the transgene for the ChR2 opsin with eYFP as a reporter. Three months after the transfection, the rats were implanted with an optical cannula and four cortical screw electrodes. Following 1 week of baseline video-EEG recording, the rats were optogenetically stimulated twice daily (8-h intervals) with a blue light (470nm) for 5 days and the output recorded. The rats were killed the day after the last stimulation by transcardial perfusion with 4% paraformaldehyde and the brains processed for histologic and immunohistochemical analysis.
